# Supplementary material
Source: Springer Nature journal article supplement (https://www.springermedizin.de/resource/supplementary/13618_2011_43_MOESM1_ESM.pdf/9681028)

Fig 1

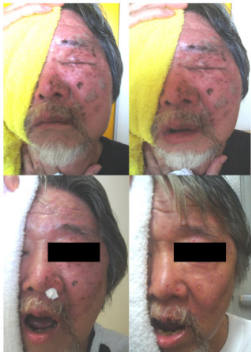

Supplement: MOESM1 [file 9681028]
